# Supplementary material
Source: PubMed Central journal article supplement (PMC2765709)

Figure E1

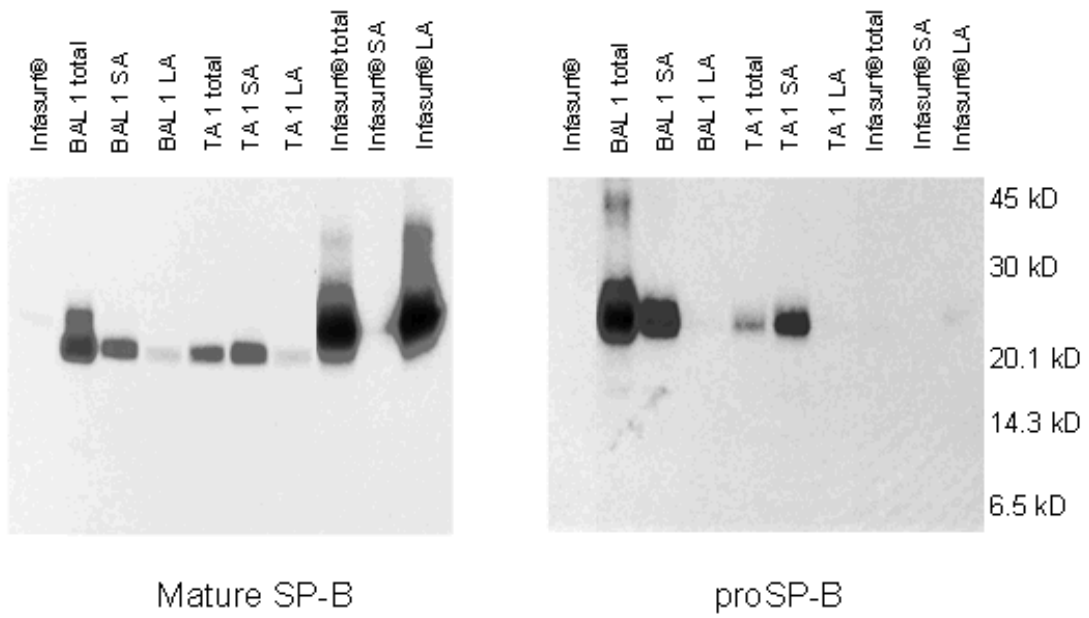

Supplement: NIHMS151796-supplement-1.pdf [file NIHMS151796-supplement-1.pdf]
